# Supplementary material for: Titania Nanofiber Scaffolds with Enhanced Biointegration Activity—Preliminary In Vitro Studies
Source: PubMed Central journal article supplement (PMC6888681; doi:10.3390/ijms20225642), 2019-11-11
Supplement: ijms-20-05642-s001.pdf [file ijms-20-05642-s001.pdf]

**Table S1.** The results of contact angle and surface free energy (SFE) measurements; contact angles were measured three times using distilled water and diiodomethane; the SFE values were determined using the Owens-Wendt method.

| <b>Biomaterial sample</b> | <b>Average contact angle [°] ± standard deviation</b> |                      | <b>Surface free energy ± standard deviation [mJ/m<sup>2</sup>]</b> |
|---------------------------|-------------------------------------------------------|----------------------|--------------------------------------------------------------------|
|                           | <b>Measuring liquid</b>                               |                      |                                                                    |
|                           | <b>Water</b>                                          | <b>Diiodomethane</b> |                                                                    |
| Ti6Al4V                   | 81.3 ± 0.2                                            | 49.2 ± 0.9           | 38.5 ± 0.3                                                         |
| TNF4S                     | 99.5 ± 0.0                                            | 61.0 ± 0.9           | 27.6 ± 0.2                                                         |
| TNF6S                     | 104.9 ± 0.1                                           | 61.9 ± 1.1           | 27.6 ± 0.3                                                         |
| TNF10S                    | 106.8 ± 0.3                                           | 48.0 ± 1.2           | 37.4 ± 0.3                                                         |
| TNF4C                     | 97.5 ± 0.1                                            | 52.0 ± 0.7           | 32.9 ± 0.2                                                         |
| TNF6C                     | 109.5 ± 0.2                                           | 48.0 ± 1.7           | 38.4 ± 0.5                                                         |
| TNF10C                    | 113,8 ± 0.3                                           | 39.4 ± 1.0           | 46.4 ± 0.3                                                         |
| TNF72a                    | 98.2 ± 0.0                                            | 59.5 ± 1.3           | 28.4 ± 0.3                                                         |
| TNF72b                    | 108.5 ± 0.3                                           | 46.2 ± 0.6           | 39.3 ± 0.2                                                         |
